# Supplementary material for: A Column Generation Algorithm with Dynamic Constraint Aggregation for Minimum Sum-of-Squares Clustering
Source: Atypon-hosted journal article supplement (doi:10.1287/ijoc.2024.0938), 2025-07-16
Supplement: ijoc.2024.0938.sm1.pdf [file ijoc.2024.0938.sm1.pdf]

## Appendix B Proof of Proposition 1

To prove that the constraint matrix  $A$  is totally unimodular, we need to show that every square submatrix of  $A$  has a determinant that is either 0, +1, or -1. Note that a row of  $A$  can have either two +1 if it corresponds to a CL constraint or one +1 and one -1 if it corresponds to an ML constraint. Let  $B$  be a  $k \times k$  submatrix of  $A$ . We show the assertion by induction on the size  $k$  that  $\det(B) \in \{0, +1, -1\}$ . If  $k = 1$ , then  $B$  has a single entry that, by assumption, is 0, +1 or -1, and therefore  $\det(B) \in \{0, +1, -1\}$ . Now take  $k \geq 2$  and assume by induction that the assertion is true for all  $(k-1) \times (k-1)$  submatrices of  $A$ . We consider four cases.

1.  $B$  has at least one row with all zero coefficients. In this case  $\det(B) = 0$ .
2.  $B$  has at least one row with one non-zero coefficient, assume it is  $b_{ij}$ . Let  $B'$  be the  $(k-1) \times (k-1)$  submatrix obtained by removing the  $i$ -th row and the  $j$ -th column from  $B$ . Developing the determinant with respect to the  $i$ -th row of  $B$  yields

$$\det(B) = b_{ij}(-1)^{i+j}\det(B') = \begin{cases} (-1)^{i+j}\det(B') & \text{if } b_{ij} = +1, \\ (-1)^{i+j+1}\det(B') & \text{if } b_{ij} = -1. \end{cases}$$

By induction,  $\det(B') \in \{0, +1, -1\}$ , and therefore  $\det(B) \in \{0, +1, -1\}$  holds.

3. Every row of  $B$  has exactly two non-zero coefficients, which are +1 and -1. In this case, the sum of all the columns of  $B$  yields a vector with all 0 entries. This implies that the columns of  $B$  are linearly dependent, and therefore  $\det(B) = 0$ .
4. Every row of  $B$  has exactly two non-zero coefficients of value 1. In this case, each row of  $B$  corresponds to a CL constraint. Let  $V_1$  and  $V_2$  be the partition of the nodes of  $G$  such that  $V = V_1 \cup V_2$  and every edge  $(i, j) \in E$  (i.e., cannot-link constraint) has one end in  $V_1$  and the other in  $V_2$ . Due to the bipartition of  $G$ , we have a partition of the columns of  $B$  as  $B = (B_1|B_2)$  where the columns in  $B_1$  resp.  $B_2$  correspond to nodes in  $V_1$  resp.  $V_2$ . Adding up all columns of  $B_1$  resp.  $B_2$  yields a vector with all 1-entries in both cases. This implies that the columns of  $B$  are linearly dependent, and therefore  $\det(B) = 0$ .

Consequently,  $\det(B) \in \{0, +1, -1\}$  follows for each square submatrix  $B$  of  $A$  and, hence, the constraint matrix  $A$  is totally unimodular □

## Appendix C Numerical results on DCA evaluation

The columns in the tables refer to the aggregation level ( $\ell$ ), to the number of sought clusters ( $k$ ), the number of CG iterations (iter), the initial number of aggregated covering constraints ( $m_{start}$ ), the final number of aggregated constraints in the final RMP after convergence ( $m_{end}$ ), the average number of aggregated covering constraints per iteration during the execution of the CG+DCA algorithm ( $m_{avg}$ ), the number of times the partition  $Q$  was updated ( $Q$  updates), the CPU time spent in the resolution of the RMP (in seconds), and the total time spent by the CG+DCA algorithm (also in seconds).

| $k$ | $\ell$ | iter  | $m_{start}$ | $m_{end}$ | $m_{avg}$ | $Q$ updates | time RMP (s) | time (s) |
|-----|--------|-------|-------------|-----------|-----------|-------------|--------------|----------|
| 2   | 150    | 10400 | 150         | 150       | 150.00    | 0           | 332.62       | 740.41   |
| 2   | 75     | 2386  | 77          | 142       | 97.53     | 32          | 7.80         | 95.56    |
| 2   | 37     | 2030  | 39          | 142       | 97.67     | 53          | 4.19         | 74.15    |
| 2   | 2      | 2527  | 2           | 141       | 103.72    | 61          | 7.85         | 85.28    |
| 3   | 150    | 3779  | 150         | 150       | 150.00    | 0           | 23.20        | 126.96   |
| 3   | 75     | 2137  | 77          | 143       | 99.60     | 42          | 3.68         | 61.11    |
| 3   | 37     | 2037  | 41          | 138       | 99.15     | 62          | 3.24         | 58.69    |
| 3   | 3      | 2200  | 3           | 137       | 100.13    | 71          | 3.75         | 61.26    |
| 4   | 150    | 3273  | 150         | 150       | 150.00    | 0           | 14.27        | 86.00    |
| 4   | 75     | 1230  | 79          | 143       | 101.01    | 42          | 1.36         | 19.57    |
| 4   | 37     | 1837  | 42          | 137       | 102.18    | 54          | 2.45         | 28.06    |
| 4   | 4      | 2296  | 4           | 137       | 102.51    | 77          | 3.48         | 31.87    |
| 5   | 150    | 2272  | 150         | 150       | 150.00    | 0           | 7.02         | 38.15    |
| 5   | 75     | 1120  | 79          | 137       | 99.84     | 37          | 1.11         | 15.37    |
| 5   | 37     | 1548  | 42          | 135       | 99.72     | 54          | 1.75         | 19.62    |
| 5   | 5      | 1188  | 5           | 126       | 98.83     | 75          | 1.02         | 14.64    |
| 6   | 150    | 1642  | 150         | 150       | 150.00    | 0           | 3.61         | 23.00    |
| 6   | 75     | 795   | 79          | 136       | 100.30    | 42          | 0.61         | 9.04     |
| 6   | 37     | 734   | 43          | 131       | 94.35     | 60          | 0.44         | 7.83     |
| 6   | 6      | 973   | 6           | 137       | 99.25     | 84          | 0.72         | 10.03    |

**Table 1** Results for ch150 and  $k \in \{2, 3, 4, 5, 6\}$ .

| $k$ | $\ell$ | iter  | $m_{start}$ | $m_{end}$ | $m_{avg}$ | $Q$ updates | time RMP (s) | time (s) |
|-----|--------|-------|-------------|-----------|-----------|-------------|--------------|----------|
| 2   | 202    | 7874  | 202         | 202       | 202.00    | 0           | 170.65       | 1062.22  |
| 2   | 101    | 10239 | 102         | 185       | 107.84    | 43          | 257.52       | 938.31   |
| 2   | 50     | 3434  | 52          | 185       | 108.94    | 66          | 16.18        | 309.65   |
| 2   | 2      | 4420  | 2           | 168       | 99.89     | 95          | 20.18        | 275.26   |
| 3   | 202    | 6974  | 202         | 202       | 202.00    | 0           | 167.25       | 698.38   |
| 3   | 101    | 6376  | 104         | 194       | 122.11    | 50          | 52.52        | 524.03   |
| 3   | 50     | 4435  | 53          | 189       | 129.31    | 68          | 28.48        | 348.91   |
| 3   | 3      | 4228  | 3           | 172       | 108.55    | 80          | 17.22        | 312.87   |
| 4   | 202    | 8477  | 202         | 202       | 202.00    | 0           | 256.64       | 866.20   |
| 4   | 101    | 4510  | 102         | 188       | 113.78    | 44          | 16.61        | 302.78   |
| 4   | 50     | 3490  | 54          | 193       | 124.12    | 68          | 15.72        | 240.16   |
| 4   | 4      | 3675  | 4           | 182       | 120.59    | 76          | 14.14        | 214.56   |
| 5   | 202    | 10390 | 202         | 202       | 202.00    | 0           | 291.07       | 901.91   |
| 5   | 101    | 3389  | 106         | 187       | 119.14    | 48          | 9.42         | 200.48   |
| 5   | 50     | 2488  | 56          | 175       | 115.88    | 61          | 5.32         | 144.01   |
| 5   | 5      | 2836  | 5           | 191       | 123.43    | 81          | 4.17         | 113.77   |
| 6   | 202    | 7069  | 202         | 202       | 202.00    | 0           | 108.18       | 428.87   |
| 6   | 101    | 2863  | 106         | 176       | 121.14    | 40          | 5.44         | 120.27   |
| 6   | 50     | 2019  | 58          | 174       | 119.55    | 53          | 3.56         | 83.56    |
| 6   | 6      | 1824  | 6           | 157       | 109.81    | 63          | 2.49         | 70.91    |

**Table 2** Results for `gr202` and  $k \in \{2, 3, 4, 5, 6\}$ 

| $k$ | $\ell$ | iter  | $m_{start}$ | $m_{end}$ | $m_{avg}$ | $Q$ updates | time RMP (s) | time (s) |
|-----|--------|-------|-------------|-----------|-----------|-------------|--------------|----------|
| 2   | 299    | 16204 | 299         | 299       | 298.98    | 0           | 3677.03      | 7200.00  |
| 2   | 149    | 7617  | 149         | 279       | 156.59    | 81          | 172.62       | 2108.85  |
| 2   | 74     | 7811  | 75          | 274       | 172.32    | 87          | 92.06        | 1273.93  |
| 2   | 2      | 3878  | 2           | 250       | 154.37    | 116         | 17.45        | 565.93   |
| 3   | 299    | 20100 | 299         | 299       | 299.00    | 0           | 1677.23      | 4596.03  |
| 3   | 149    | 5682  | 149         | 285       | 173.35    | 69          | 44.81        | 832.01   |
| 3   | 74     | 7008  | 75          | 288       | 163.59    | 102         | 66.46        | 903.76   |
| 3   | 3      | 5501  | 3           | 267       | 177.38    | 109         | 47.15        | 689.43   |
| 4   | 299    | 16745 | 299         | 299       | 299.00    | 0           | 821.31       | 2688.85  |
| 4   | 149    | 7024  | 149         | 291       | 182.85    | 69          | 77.32        | 904.71   |
| 4   | 74     | 4921  | 78          | 282       | 163.20    | 103         | 31.50        | 556.38   |
| 4   | 4      | 4183  | 4           | 272       | 175.62    | 125         | 29.00        | 454.41   |
| 5   | 299    | 19277 | 299         | 299       | 299.00    | 0           | 1117.98      | 2891.24  |
| 5   | 149    | 4382  | 151         | 288       | 183.80    | 76          | 22.71        | 379.86   |
| 5   | 74     | 3476  | 82          | 280       | 161.84    | 98          | 12.54        | 287.29   |
| 5   | 5      | 3336  | 5           | 252       | 139.84    | 125         | 9.54         | 266.00   |
| 6   | 299    | 12113 | 299         | 299       | 299.00    | 0           | 405.30       | 1270.82  |
| 6   | 149    | 2650  | 153         | 279       | 175.45    | 79          | 8.01         | 198.43   |
| 6   | 74     | 2002  | 86          | 270       | 165.83    | 111         | 3.45         | 119.60   |
| 6   | 6      | 1751  | 6           | 260       | 143.60    | 154         | 2.31         | 105.36   |

**Table 3** Results for `pr299` and  $k \in \{2, 3, 4, 5, 6\}$

| $k$ | $\ell$ | iter  | $m_{start}$ | $m_{end}$ | $m_{avg}$ | $Q$ updates | time RMP (s) | time (s) |
|-----|--------|-------|-------------|-----------|-----------|-------------|--------------|----------|
| 2   | 417    | 7910  | 417         | 417       | 416.95    | 0           | 2931.76      | 7200.00  |
| 2   | 208    | 12671 | 208         | 299       | 208.73    | 82          | 657.14       | 6703.35  |
| 2   | 104    | 2134  | 105         | 186       | 109.37    | 84          | 3.68         | 597.66   |
| 2   | 2      | 171   | 2           | 70        | 38.77     | 48          | 0.04         | 57.97    |
| 3   | 417    | 14086 | 417         | 417       | 416.97    | 0           | 2506.00      | 7200.00  |
| 3   | 208    | 5962  | 208         | 317       | 211.10    | 105         | 76.03        | 1613.87  |
| 3   | 104    | 2432  | 104         | 192       | 109.21    | 70          | 4.26         | 558.56   |
| 3   | 3      | 1403  | 3           | 134       | 100.36    | 99          | 1.43         | 306.14   |
| 4   | 417    | 22756 | 417         | 417       | 417.00    | 0           | 2170.16      | 6339.07  |
| 4   | 208    | 5132  | 208         | 324       | 210.82    | 112         | 49.83        | 1199.89  |
| 4   | 104    | 1502  | 105         | 197       | 112.75    | 78          | 1.60         | 241.64   |
| 4   | 4      | 76    | 4           | 41        | 28.62     | 24          | 0.01         | 13.52    |
| 5   | 417    | 10798 | 417         | 417       | 417.00    | 0           | 232.79       | 1207.81  |
| 5   | 208    | 2457  | 208         | 317       | 215.59    | 96          | 6.22         | 216.44   |
| 5   | 104    | 1070  | 104         | 233       | 131.98    | 113         | 0.77         | 83.92    |
| 5   | 5      | 174   | 5           | 83        | 49.12     | 58          | 0.03         | 12.92    |
| 6   | 417    | 10119 | 417         | 417       | 417.00    | 0           | 144.55       | 911.73   |
| 6   | 208    | 2141  | 208         | 334       | 218.80    | 110         | 4.30         | 157.55   |
| 6   | 104    | 844   | 104         | 212       | 122.88    | 95          | 0.48         | 54.48    |
| 6   | 6      | 129   | 6           | 73        | 43.64     | 55          | 0.02         | 9.04     |

**Table 4** Results for  $\epsilon 1417$  and  $k \in \{2, 3, 4, 5, 6\}$

## Appendix D Bar charts on the DCA dual variable disaggregation strategies

The bar charts of Figures 1-2 present the number of CG iterations, the total CG+DCA CPU time (in seconds), the average number of constraints in the aggregated master problem ( $m_{avg}$ ), and the final number of constraints when the method completes ( $m_{end}$ ) for data instances `gr202` and `pr299` for  $k \in \{2, 3, 4, 5, 6\}$ . Similar conclusions are found for instances `ch150` and `f1417`.

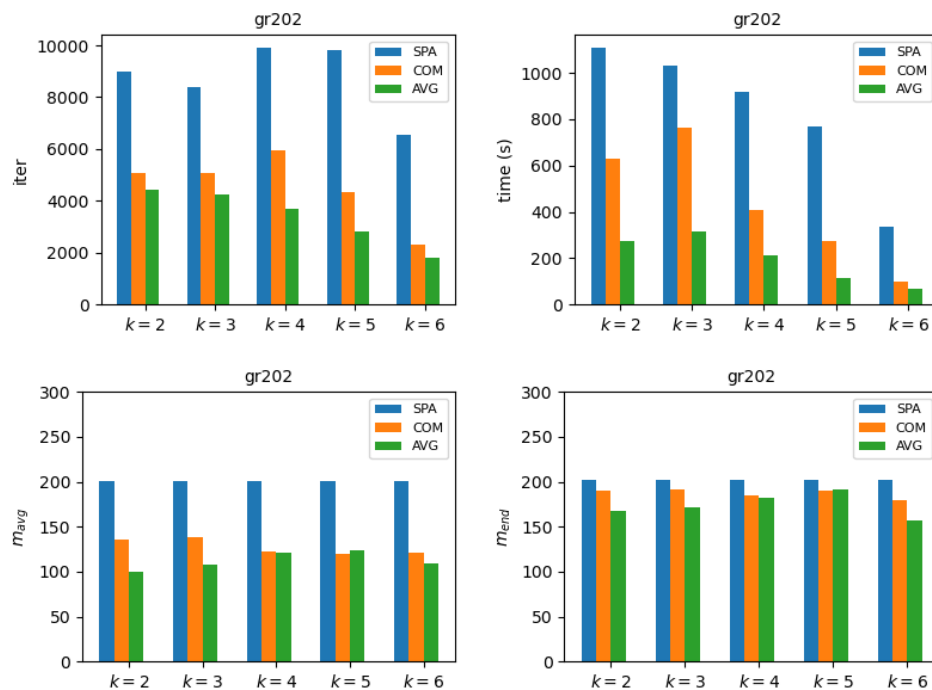

Figure 1 Results of the CG+DCA algorithm under dual disaggregation strategies *sparse* (SPA), *complementary* (COM), and *average* (AVG) for data instance `gr202` and  $k \in \{2, 3, 4, 5, 6\}$ .

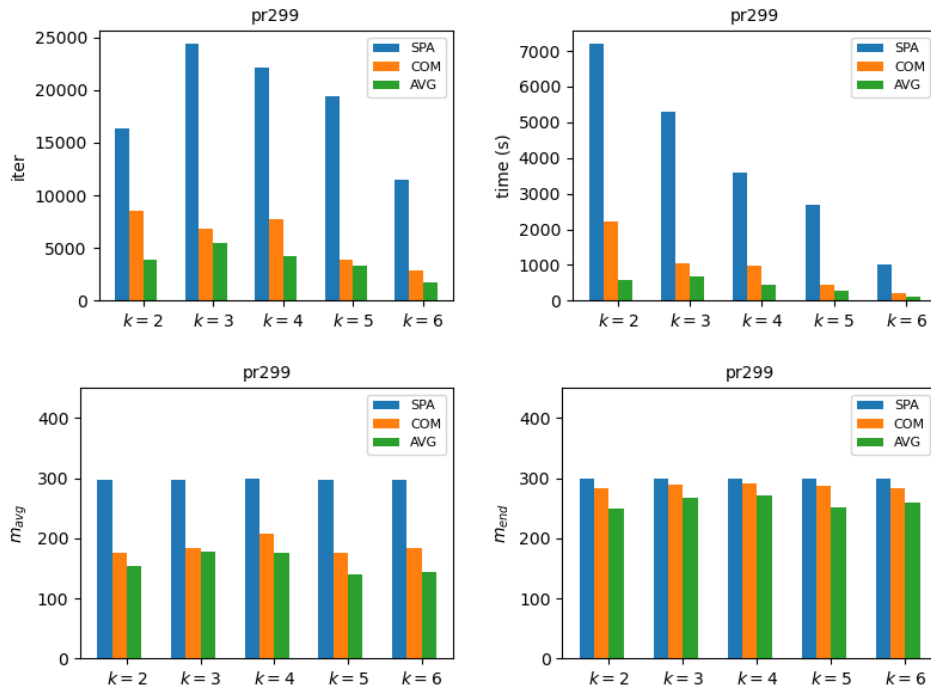

Figure 2 Results of the CG+DCA algorithm under dual disaggregation strategies *sparse* (SPA), *complementary* (COM), and *average* (AVG) for data instance `pr299` and  $k \in \{2, 3, 4, 5, 6\}$ .

## Appendix E Bar charts on $Q$ disaggregation

The bar charts refer to the average number of incompatibilities of the entering incompatible column ( $u_{avg}$ ), the total number of times the aggregating partition  $Q$  was updated (Q updates), total computing times spent by the algorithm CG+DCA, and the average number of constraints in the aggregated RMP ( $m_{avg}$ ).

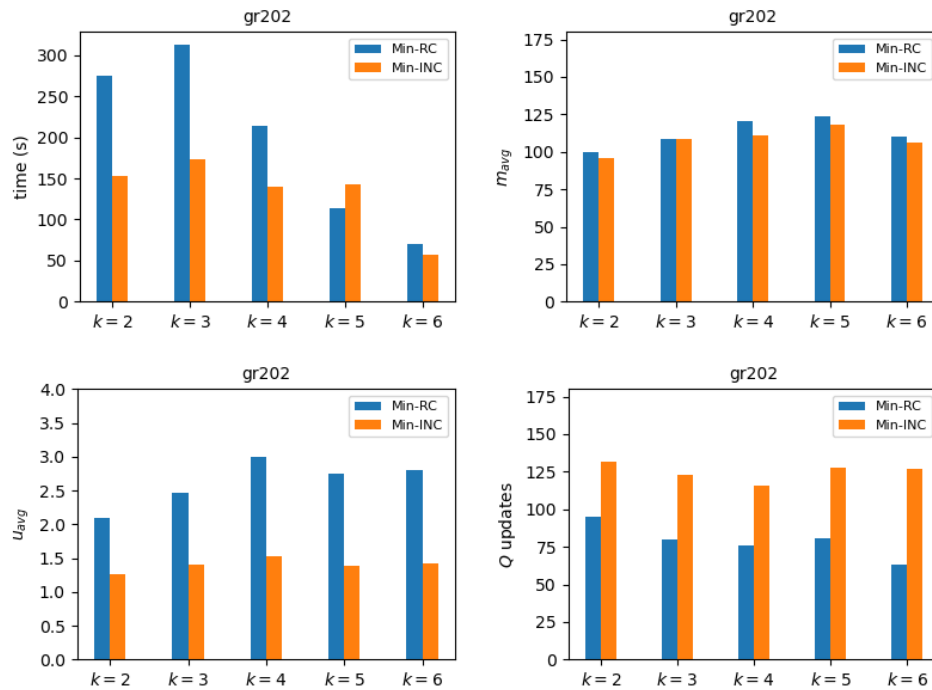

**Figure 3** Results of the CG+DCA algorithm under partition disaggregation strategies *Min-RC* and *Min-INC* for data instance *gr202* and  $k \in \{2, 3, 4, 5, 6\}$ .

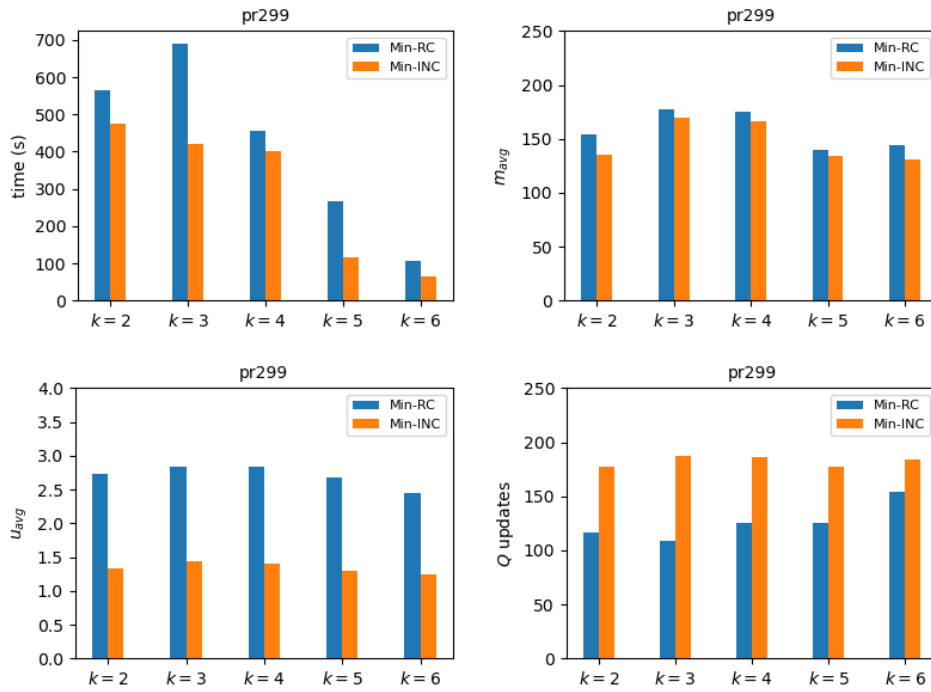

Figure 4 Results of the CG+DCA algorithm under partition disaggregation strategies *Min-RC* and *Min-INC* for data instance *pr299* and  $k \in \{2, 3, 4, 5, 6\}$ .
